# Supplementary material
Source: HighWire-hosted journal article supplement (https://jcp.bmj.com/highwire/filestream/198930/field_highwire_adjunct_files/3/jcp-2023-208987supp004_data_supplement.pdf)

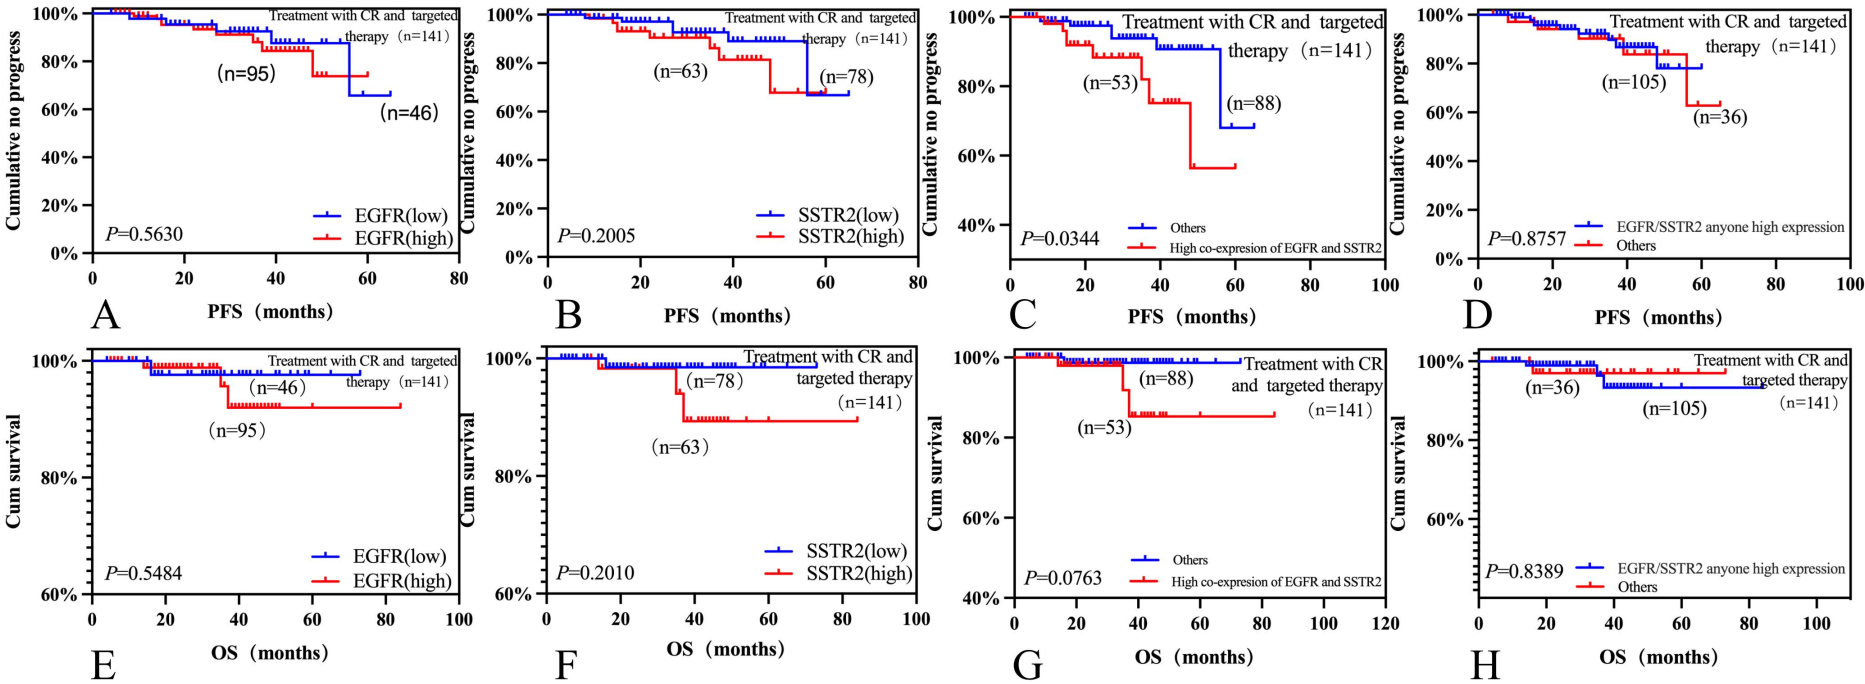

Supplementary Figure 1, Y Xu et al

Supplement: jcp-2023-208987supp004_data_supplement.pdf [file jcp-2023-208987supp004_data_supplement.pdf]
